# Supplementary material
Source: PubMed Central journal article supplement (PMC5844350)
Supplement: NIHMS886574-supplement-Zhang_et_al__supplemental_figure.pdf [file NIHMS886574-supplement-Zhang_et_al__supplemental_figure.pdf]

# Supplemental Figure 1

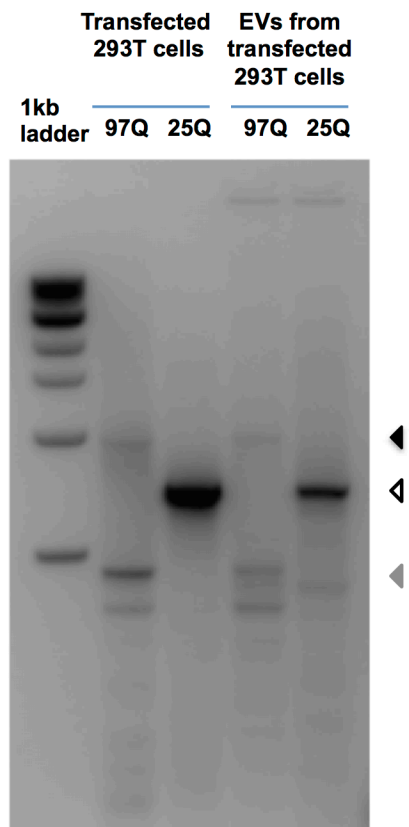

Zhang et al.

## Supplemental Figure 2

Non-differentiated

Differentiated

Htt Q7/Q7

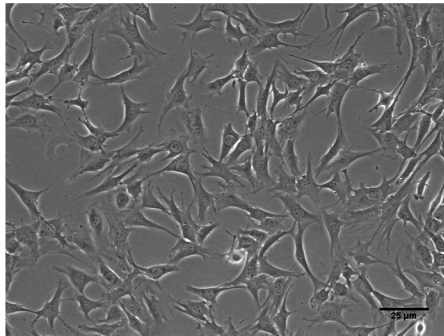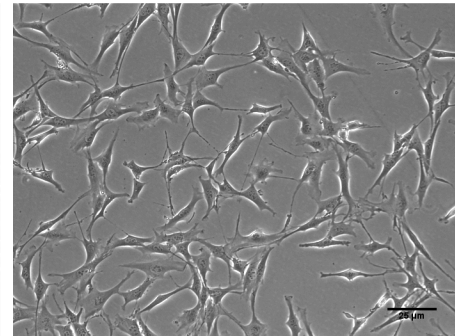

Htt Q111/Q111

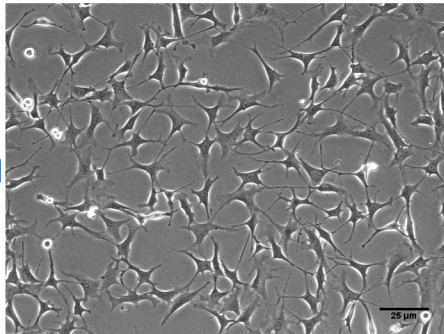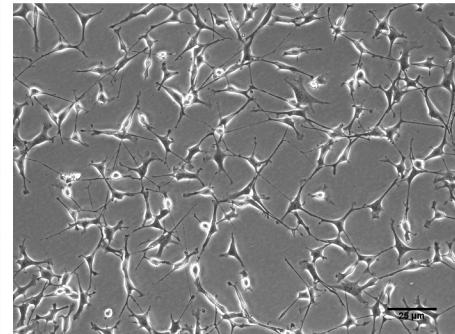

Zhang et al.

### Supplemental Figure 3

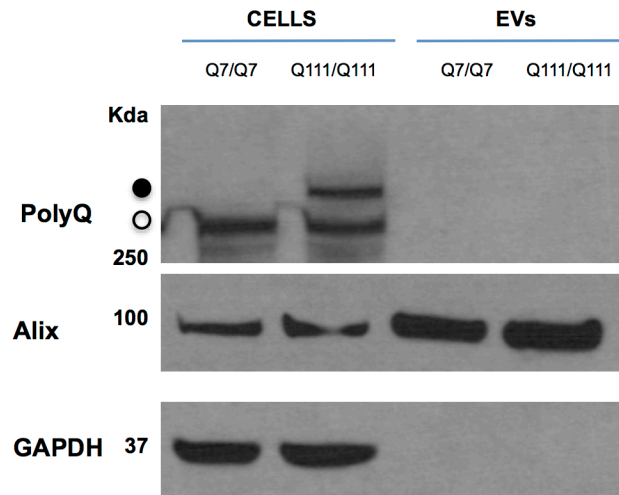

Zhang et al.

**Supplemental figure S1. RT-PCR of polyQ-GFP RNA with different repeat lengths from transduced 293T cells and EVs.** 293T cells were transduced using lentiviral vectors encoding GFP (not shown), Htt<sup>ex1</sup>-25Q-GFP, and Htt<sup>ex1</sup>-97Q-GFP. Two weeks later (equivalent to about 6 passages) RNA from cells and EVs was extracted using the miRNeasy mini kit. RT-PCR products were analyzed on 1 % agarose gel using 1 kb Quick-Load ladder. [Open arrowhead—25Q-GFP; solid arrowhead—97Q-GFP; gray arrowhead—GFP RNAs.]

**Supplemental figure S2. Bright field image showing striatal neuron-like STHdhQ7/Q7 and STHdhQ111/Q111 cells 12 h after differentiation.** Immortalized mouse striatal cell lines, STHdhQ111/Q111 and STHdhQ7/Q7 were normally cultured in high glucose DMEM (Corning) plus 10 % FBS and 40 mg/ml of G418 at 33°C. After neuronal differentiation, which was induced by incubation with a dopamine cocktail of  $\alpha$ -FGF (10 ng/ml), 3-IBMX (240  $\mu$ M), forskolin (48.6  $\mu$ M), and dopamine (5  $\mu$ M) (Sigma) in DMEM/F12 for 12 h, cells develop long neuron-like processes with STHdhQ7/Q7 appearing to have larger soma than the STHdh Q111/Q111 cells.

**Supplemental figure S3. HTT protein was detected in the STHdh111/111 cells but not in the EVs from these cells.** Striatal cells were allowed to attach for 6 h before being differentiated. Cells and EVs in conditioned media were harvested from both striatal cell lines 48 h after differentiation. Western blots were performed for both striatal cells and EV lysates using monoclonal 3B5H10 antibody. The HTT protein (approx. 350 kDa) was found in STHdh111/111 cells, but was not detectable in STHdh7/7 cells, consistent with the low levels of HTT protein in the latter (Krauss et al. [2013](#)). No HTT immunoreactive proteins were found in the EVs from these cell lines. Open circle = non-specific protein; solid circle = HTT protein.

**Supplementary Table 1.** Average Ct value of all genes and conditions used to calculate the HTT RNA loading into EVs

|                 | RNA  | Average Ct value <sup>a</sup> | Standard deviation |
|-----------------|------|-------------------------------|--------------------|
| Q7/Q7 cells     | Hdh  | 23.52                         | 0.66               |
|                 | HPRT | 21.73                         | 0.50               |
|                 | ActB | 16.83                         | 0.26               |
| Q7/Q7 EVs       | Hdh  | 29.66                         | 0.78               |
|                 | HPRT | 26.28                         | 1.96               |
|                 | ActB | 20.80                         | 1.62               |
| Q111/Q111 cells | Hdh  | 24.05                         | 0.65               |
|                 | HPRT | 21.91                         | 0.55               |
|                 | ActB | 17.32                         | 0.55               |
| Q111/Q111 EVs   | Hdh  | 28.10                         | 0.82               |
|                 | HPRT | 28.10                         | 0.82               |
|                 | ActB | 19.96                         | 1.16               |

<sup>a</sup> Average Ct value of n=3 experiments with duplicate measurements
